1 **EpiMethylTag simultaneously detects ATAC-seq or ChIP-seq signals with DNA**  
2 **methylation**

3 Priscillia Lhoumaud<sup>1</sup>, Gunjan Sethia<sup>1</sup>, Franco Izzo<sup>2,3</sup>, Theodore Sakellaropoulos<sup>1,4</sup>, Valentina  
4 Snetkova<sup>1</sup>, Simon Vidal<sup>5</sup>, Sana Badri<sup>1</sup>, MacIntosh Cornwell<sup>1</sup>, Dafne Campigli Di Giammartino<sup>6</sup>,  
5 Kyu-Tae Kim<sup>2,3</sup>, Effie Apostolou<sup>6</sup>, Matthias Stadtfeld<sup>5</sup>, Dan Avi Landau<sup>2,3,7</sup>, Jane Skok<sup>1,5#</sup>.

6  
7 **Email addresses:**

8 Priscillia.Lhoumaud@nyumc.org  
9 Gunjan.Sethia@nyumc.org  
10 fri2002@med.cornell.edu  
11 Theodoros.Sakellaropoulos@nyulangone.org  
12 snetkv01@nyu.edu  
13 simon.vidal@gmail.com  
14 Sana.Badri@nyumc.org  
15 MacIntosh.Cornwell@nyulangone.org  
16 dac2051@med.cornell.edu  
17 thinktank.q@gmail.com  
18 efa2001@med.cornell.edu  
19 mas4011@med.cornell.edu  
20 dlandau@nygenome.org  
21 Jane.Skok@nyulangone.org

22  
23 **Affiliations:**

24 <sup>1</sup>New York University Langone Health, New York, NY, USA;

25 <sup>2</sup>New York Genome Center, New York, NY, USA;

26 <sup>3</sup>Meyer Cancer Center, Weill Cornell Medicine, New York, NY, USA;

27 <sup>4</sup>Laura and Isaac Perlmutter Cancer Center, NYU School of Medicine, New York, NY 10016, USA.

28 <sup>5</sup>Skirball Institute of Biomolecular Medicine, Department of Cell Biology, Helen L. and Martin S.  
29 Kimmel Center for Biology and Medicine, Laura and Isaac Perlmutter Cancer Center, New York,  
30 NY, USA;

31 <sup>6</sup>Sanford I. Weill Department of Medicine, Sandra and Edward Meyer Cancer Center, Weill Cornell  
32 Medicine, New York, NY, USA;

33 <sup>7</sup>Institute of Computational Biomedicine, Weill Cornell Medicine, New York, NY, USA.

34 # Corresponding author.

35 Correspondence: Jane.Skok@nyulangone.org

36 **Key words:** DNA methylation, chromatin accessibility, ChIP, ATAC, CTCF, KLF4.

37 Running title: EpiMethylTag: ATAC/ChIP with bisulfite conversion.

1 **Abstract (100 words max)**

2 Activation of regulatory elements is thought to be inversely correlated with DNA methylation  
3 levels. However, it is difficult to determine whether DNA methylation is compatible with chromatin  
4 accessibility or transcription factor (TF) binding if assays are performed separately. We developed  
5 a fast, low input, low sequencing depth method, EpiMethylTag that combines ATAC-seq or ChIP-  
6 seq (M-ATAC or M-ChIP) with bisulfite conversion, to simultaneously examine accessibility/TF  
7 binding and methylation on the same DNA. Here we demonstrate that EpiMethylTag can be used  
8 to study the functional interplay between chromatin accessibility and TF binding (CTCF and KLF4)  
9 at methylated sites.

10

## 1 **Introduction**

2 The role of DNA methylation (DNAm) in gene regulation has been widely described [1-4]. In  
3 general, methylation is thought to reduce accessibility and prohibit TF binding at enhancers and  
4 promoters [5, 6]. Nevertheless, TFs are also known to bind methylated DNA [2], but due to  
5 limitations in the techniques available for this kind of analysis, few genome wide studies have  
6 been performed. As a result, we still know very little about the DNA sequence and chromatin  
7 context of TF binding at methylated sites and its significance to gene regulation.

8 Several techniques have been developed to measure DNAm, some more comprehensive than  
9 others. Whole genome bisulfite sequencing (WGBS) covers all genomic regions, however, to  
10 achieve sufficient sequencing coverage is costly. The alternative, reduced representation bisulfite  
11 sequencing (RRBS), which requires less sequencing depth, preferentially captures CpG-dense  
12 sequences known as CpG islands that can potentially act as regulatory elements [7].  
13 Nevertheless, both techniques require additional assays on different batches of cells to elucidate  
14 the interplay between DNAm, DNA accessibility and TF binding and this does not satisfactorily  
15 address the issue of compatibility. Current techniques that simultaneously analyze methylation  
16 together with TF binding or accessibility (NOME-seq [8], HT-SELEX [9], ChIP-bisulfite [10],  
17 BisChIP-seq [11], ChIP-BisSeq [12]) have drawbacks such as analysis of DNA rather than  
18 chromatin and the requirement of **large amounts of input DNA** or high sequencing costs.

19 To circumvent the high input and sequencing expenses associated with WGBS and existing ChIP  
20 combined with bisulfite conversion protocols [10-12], we developed 'EpiMethylTag'. This  
21 technique combines ATAC-seq or ChIPmentation [13, 14] with bisulfite conversion (M-ATAC or  
22 M-ChIP, respectively) to specifically determine the methylation status of accessible or TF-bound  
23 regions in a chromatin context. EpiMethylTag is based on an approach that was originally

1 developed for tagmentation-based WGBS [15, 16]. It involves use of the Tn5 transposase, loaded  
2 with adapters harboring cytosine methylation (**Table S1**).

3 For M-ATAC or M-ChIP, tagmentation occurs respectively on nuclear lysates as per the  
4 conventional ATAC-seq protocol [13], or during chromatin immunoprecipitation as per the  
5 CHIPmentation protocol [14]. Following DNA purification, the sample is bisulfite converted and  
6 PCR amplified for downstream sequencing (**Fig. 1a**). As shown in **Fig. 1a**, EpiMethylTag can  
7 determine whether DNAm and accessibility/TF binding are mutually exclusive (scenario 1) or  
8 can coexist in certain locations (scenario 2). The protocol requires **lower levels of**  
9 **immunoprecipitated DNA**, less sequencing depth, is quicker than existing methods and can be  
10 analyzed using a pipeline we developed that is publicly available online on Github  
11 (["https://github.com/skoklab/EpiMethylTag"](https://github.com/skoklab/EpiMethylTag)).

## 12 **Results**

13

14 *EpiMethylTag is a reproducible method for testing the compatibility of DNAm with TF binding or*  
15 *chromatin accessibility.*

16 M-ATAC and CTCF M-ChIP were performed in duplicate on murine embryonic stem cells  
17 (mESC). As controls, we collected aliquots before bisulfite conversion, ATAC-seq and CTCF  
18 CHIPmentation with Nextera transposase [13, 14]. Sequencing metrics are shown in **Fig. 1b** and  
19 **Table S2**. The price is around 10 times lower than WGBS given that fewer reads are necessary.

20 As shown in **Fig. 2a and 2b**, genome coverage was highly reproducible between M-ATAC  
21 replicates and highly correlated with regular ATAC-seq and M-ATAC signal before bisulfite  
22 treatment. Thus, bisulfite treatment, or the use of a different transposase does not result in signal  
23 bias. High reproducibility was also seen for CTCF M-ChIP, and we observed consistency between  
24 our results and data generated by CTCF ChIP-BisSeq, a similar technique that was performed

1 using 100ng of immunoprecipitated DNA (as opposed to less than 1ng using our method) and  
2 sequenced more deeply at higher cost [12] (Fig. 2a and 2b, Table S2). Of note, bisulfite  
3 conversion does not affect the number of peaks detected, the Jaccard index of peak overlap  
4 (Figure S1a-b) or the signal within peaks (Figure S1c, Pearson correlations above 0.8), although  
5 it leads to shorter reads (Figure S2). Of note, average methylation was higher at the edges of the  
6 peaks than at the midpoint (Figure S3). Comparable DNA methylation levels were found in M-  
7 ATAC and CTCF M-ChIP replicates, Pearson correlation = 0.76 and 0.84, respectively (Figure  
8 S4a and S4b).

9 In order to get higher coverage for subsequent DNA methylation analysis, peaks were called from  
10 merged M-ATAC and M-ChIP replicates and we focused our analysis only at CpGs within those  
11 peak regions covered by at least five reads, as methylation outside of M-ATAC and M-ChIP peaks  
12 has low coverage and is less reliable. We observe positive correlations between DNA methylation  
13 from WGBS and M-ATAC (Fig. 2c, top panel, Pearson correlation=0.69), and between  
14 methylation levels in M-ChIP and WGBS (Fig. 2c, bottom panel, Pearson correlation = 0.74).  
15 Similar results were observed with the previously published CTCF ChIP-BisSeq method [12]  
16 (GSE39739) (Pearson correlation = 0.83, Figure S4c) and when taking peaks that overlap  
17 between duplicates (Fig. S4d-e). In Fig. 2b, we highlight the *Klf4* gene, which harbors a peak of  
18 chromatin accessibility in the promoter and CTCF binding in the intragenic region associated with  
19 low methylation from both EpiMethylTag and WGBS assays (left panel). In contrast, the *Pisd-ps1*  
20 intragenic region contains accessible chromatin that coexists with high levels of DNA methylation  
21 as detected by both M-ATAC and WGBS (Fig. 2b, middle panel). Of note, the methylation  
22 observed comes from a bedGraph file, output from Bismark (see method section for details),  
23 which does not filter for cytosines with low read coverage. Therefore, high methylation observed  
24 in CTCF M-ChIP may not be reliable as this region harbors a weak CTCF signal with a low read  
25 coverage (Table S3). Interestingly, a proportion of M-ATAC peaks exhibited an intermediate-to-

1 high average methylation level in deeply sequenced WGBS [17], but low methylation in M-ATAC  
2 (**Fig. 2c**, top panel, top left corner) as illustrated at the *Slc5a8* locus (**Fig. 2b**, right panel, **Table**  
3 **S3**). The peak highlighted within the *Slc5a8* locus harbors an average methylation of 18.685% for  
4 M-ATAC and 85.041% for WGBS. These data suggest that as expected open regions are less  
5 methylated than closed regions within a population of cells, but that accessibility and methylation  
6 can coexist at a small subset of genomic locations, which are depleted for promoter regions and  
7 associated with low transcription (**Figure S4f-g**). Importantly, M-ATAC is able to identify  
8 methylation levels within ATAC peaks, information that cannot be retrieved integrating data from  
9 separate WGBS and ATAC-seq experiments.

#### 10 *M-ATAC reveals a complex interplay between accessible chromatin and DNA methylation*

11 For further analysis, we separated CpGs in M-ATAC peaks according to percentage of  
12 methylation (low 0-20%, intermediate 20-80% and high >80%) and read coverage (high > 50  
13 reads and low 5-50 reads) as follows: #1: Low methylation/High coverage (22932 CpGs); #2: Low  
14 Methylation/Low coverage (1348931 CpGs); #3: Intermediate methylation/Low coverage (39321  
15 CpGs); #4: High methylation/Low coverage (1652 CpGs) (**Fig. 3a**). As expected, coverage and  
16 methylation from M-ATAC are anticorrelated and we did not detect any CpGs with intermediate  
17 or high methylation with high ATAC coverage (>50 reads). **A similar pattern was observed while**  
18 **taking only CpGs presents in peaks that overlap between M-ATAC replicates (Figure S5a).** Of  
19 note, this pattern was not detected in WGBS where a more stable coverage is observed  
20 independent of methylation levels resulting in only 3 groups (**Figure S5b**) as opposed to the 4  
21 groups seen with methyl-ATAC (**Fig. 3a**). CpGs in low methylation M-ATAC groups 1 and 2 were  
22 enriched at promoters, while CpGs in intermediate and high methylation M-ATAC groups 3 and  
23 4, were enriched in intragenic and intergenic regions, as compared to the full set of M-ATAC  
24 peaks (**Fig. 3b**). The average methylation was more negatively correlated with transcriptional

1 output for CpGs at promoters (**Fig. 3c**) than for intragenic CpGs (**Figure S5c**). Heatmaps for M-  
2 ATAC read coverage intensity highlight the reproducibility of signal between individual replicates.  
3 Merged replicates were used for downstream analysis (**Figure S5d**). Intriguingly, H3K4me1  
4 showed a pronounced enrichment at CpGs with high levels of methylation (group 4) at promoter  
5 regions (**Fig. 3d and Figure S5e**). In contrast, H3K27ac and H3K4me3 were enriched at CpGs  
6 with low levels of methylation (groups 1 and 2), for both promoters and non-promoters.

### 7 *CTCF M-ChIP enables analysis of DNA methylation of distinct CpGs in the CTCF motif*

8 As a case study, CTCF M-ChIP was used to analyze the impact of DNAm on CTCF binding in  
9 M-ATAC peaks harboring a CTCF motif (**Fig. 4a**, top panel). M-ATAC groups 2 and 3 comprise  
10 the vast majority of CpGs, more CTCF peaks, motifs and a proportional higher number of CpGs  
11 within CTCF motifs (**Figure S5f**). However the percentage of CpGs within CTCF motifs in each  
12 group is fairly constant: between 1.26% to 1.93% of CpGs). Of note, *de novo* CTCF motifs in  
13 CTCF ChIP-seq and Methyl-ChIP peaks were comparable to the MA0139.1 motif from the Jaspas  
14 database (**Figure S6a**). CTCF occupancy has been inversely correlated with DNA methylation  
15 [18]. This finding is consistent with our analyses (**Figure S6b-d**). Although CTCF peaks are  
16 associated with all levels of CpG methylation within CTCF motifs, as illustrated in **Figure S6e**, the  
17 majority of CTCF peaks harbor reduced methylation (**Figure S6f**). In the context of CpGs in M-  
18 ATAC peaks, our data also demonstrates that the CTCF motif has an enriched CTCF intensity at  
19 CpGs with low and intermediate levels of methylation (groups 2 and 3) compared to CpGs with  
20 low and high levels of methylation (groups 1 and 4) (**Fig. 4a**, bottom panel). The highest binding  
21 is found in groups 2 and 3, compared to groups 1 and 4 that harbor reduced CTCF enrichment.  
22 Group 2 displays a wide range of accessibility (**Figure S5d-e**), with the most open regions of  
23 group 2 resembling group 1, and the most closed regions of this group being similar to that of  
24 group 3. Interestingly, even though there are more CpGs in CTCF motifs in group 1 compared to

1 group 4 (**Figure S5f**, 288 versus 25 CpGs), group 1 shows a lower level of CTCF enrichment than  
2 group 4. This may be due to the confidence of attributing CpGs to a specific group. As shown in  
3 **Figure S6g**, for all clusters, more than half of the CpGs have a high probability of being in the  
4 assigned group (> 72%). These data provide insight into CTCF binding and suggest an  
5 anticorrelation between high accessibility and high methylation.

6 The MA0139.1 CTCF motif incorporates 2 CpGs: C2 and/or C12 (**Fig. 4b**, top panel). According  
7 to the CTCF logo, we identified more CpGs at position C12 than C2 in the CTCF M-ChIP peaks  
8 (4884 versus 921 CpGs, respectively, considering only the CpGs covered by at least 5 reads in  
9 both M-ChIP and WGBS). Consistent with the findings from a recent study that analyzed CTCF  
10 binding using oligonucleotides rather than genomic DNA [19], CTCF M-ChIP detected higher  
11 levels of methylation at C12 compared to C2 (**Fig. 4b**, bottom panel, compare CTCF M-ChIP C2  
12 versus C12, p-value = 1.02e-12). Importantly, CTCF M-ChIP is more suitable than WGBS for  
13 detecting the differences (**Fig. 4b**, bottom panel, compare CTCF M-ChIP versus WGBS, p-value  
14 = 0.023). In addition, we found that bi-methylation at both CpGs within the same read is slightly  
15 enriched compared to what is expected by random chance (0.97% versus 0.05%) (**Figure S7a**,  
16  $\chi^2 = 1531$ , p-value < 0.001). CTCF signal intensity is relatively comparable at the 4 combinations  
17 of methylation, with a slight increase for C2 being methylated and C12 unmethylated (**Figure**  
18 **S7b**), however the biological significance of this remains to be determined. Nonetheless,  
19 sequence variation at the C2 and C12 positions appears to have no effect on methylation levels  
20 (**Figure S7c**).

21 *KLF4 M-ChIP enables characterization of WT versus mutant KLF4 R462A binding*

22 Pioneer transcription factors need to access target genes that are inaccessible and whose  
23 enhancer and promoter sequences may be methylated. A recent study has shown that a minority  
24 of transcription factors (47 out of 1300 examined) including KLF4 can bind to methylated CpG



1 sites [2]. A scatter plot of KLF4 M-ChIP in WT mESCs shows that the majority of CpGs in KLF4  
2 peaks display low peak intensity and low methylation (**Fig. 4c**). However, in contrast to CTCF,  
3 the small fraction of peaks with the highest peak intensity also display the highest methylation  
4 levels. The study mentioned above [2], revealed that distinct zinc fingers on KLF4 mediate KLF4's  
5 binding activity with methylated and unmethylated DNA. Residue arginine 458 on human KLF4  
6 was shown to be important for binding to the methylated motif CCmCpGCC [2] (similar to the  
7 Jaspar motif MA0039.2 for mouse KLF4). In the mouse protein the equivalent arginine residue  
8 lies at position 462.

9 In order to investigate the binding of KLF4 to methylated DNA, we used *Klf4*<sup>-/-</sup> mESCs [20] that  
10 express either a WT or mutant version of KLF4 in which arginine 462 has been replaced by  
11 alanine (R462A) (**Figure S8a-b**). We performed KLF4 M-ChIP in both WT and mutant expressing  
12 mESC in duplicates. Intersections between replicates were used to identify peaks specific to (i)  
13 WT or (ii) mutant versions of KLF4 and (iii) those that were common to both (**Fig. 4d**). Heatmaps  
14 confirm the binding specificity of the two versions of KLF4 and reveal the high reproducibility  
15 between duplicates (**Figure S8c**).

16 We searched for mouse KLF4 motifs from the Jaspar database, using the FIMO tool from the  
17 MEME suite. The two motifs that were identified, MA0039.2 and MA0039.1 can be distinguished  
18 by the presence and absence of a CpG dinucleotide, respectively (**Fig. 4e, top**). The wild-type  
19 version of KLF4 has a strong preference for motif MA0039.2 while the mutant loses this  
20 preference. Overall the mutant protein has reduced binding to both motifs (**Fig. 4e, bottom**).

21 Because of the low numbers of consensus KLF4 motifs in common and KLF4 mutant specific  
22 peaks, we decided to focus our downstream analysis only on WT specific peaks. M-ATAC  
23 experiments conducted in duplicates in both WT and Mutant KLF4 expressing cells show that  
24 KLF4 peaks present only in the WT condition are accessible, while Mutant only KLF4 peaks are

1 found at inaccessible sites (**Fig. 4f**). This result together with the motif findings (**Fig. 4e**) suggest  
2 that the Mutant KLF4 binding alone occurs at inaccessible sites where there is no consensus  
3 KLF4 motif. Thus, this mutation abrogates binding at consensus KLF4 motifs. The functional  
4 significance of binding of Mutant KLF4 at ectopic sites remains to be investigated. WT specific  
5 KLF4 peaks harbor similar DNA accessibility in both WT and Mutant conditions so it is not clear  
6 why the Mutant protein does not bind. To investigate, we analyzed DNA methylation at these sites  
7 using M-ATAC, M-ChIP and public WGBS from WT mESCs. The levels of methylation obtained  
8 from M-ATAC were also compared for cells expressing WT and Mutant KLF4 within the WT  
9 specific KLF4 M-ChIP peaks. In the scatter plots shown in **Fig. 4g** and **Figure S8d**, most of the  
10 CpGs display low levels of methylation in any condition (bottom left corner). Thus, methylation  
11 levels do not explain the absence of Mutant KLF4 binding at these sites.

## 12 **Discussion**

13 We developed a new method, “EpiMethylTag”, that allows the simultaneous analysis of DNA  
14 methylation with ChIP-seq or ATAC-seq. EpiMethylTag can be used to analyze the methylation  
15 status and coincident accessibility or binding of other chromatin bound transcription factors.  
16 Importantly our approach is a fast, low input, low sequencing depth method that can be used for  
17 smaller cell populations than existing methods and can adapted for rare cell populations.  
18 Specifically, our M-ChIP protocol significantly reduces the input for DNA binding factors such as  
19 CTCF. The only published genome-wide ChIP-Bis-Seq for CTCF [12] used 100 ng of  
20 immunoprecipitated DNA. Using a Tn5 transposase successfully allowed us to use less than 1ng  
21 of immunoprecipitated DNA followed by bisulfite conversion. The number of cells required to  
22 obtain 1ng of ChIPped DNA will vary depending on the protocol and the antibody used. ChIP-  
23 bisulfite [10] and BisChIP-seq [11] use lower **cell numbers** for H3K27me3. However, such histone  
24 modifications in general require less cells for ChIP on TFs such as CTCF or KLF4 because they

1 cover a higher portion of the genome. **Although it has not been tested, our protocol may** also lower  
2 the number of cells required for M-ChIP of histone modifications.

3 EpiMethylTag confirmed that as a general rule, DNA methylation rarely coexists with DNA  
4 accessibility or TF binding. Nonetheless, we found M-ATAC peaks of low signal intensity that  
5 overlapped with DNA methylation. These peaks were located predominantly in intragenic and  
6 intergenic regions and associated with low transcriptional output at gene promoters. This data  
7 identifies a class of promoters with high accessibility, high levels of methylation, high H3K4me1,  
8 low K3K4me3 and low H3K27ac (**Fig. 3d**). The biological relevance of such 'poised promoters',  
9 remains to be determined.

10 Of note, a recent publication used the same design for the Methyl-ATAC aspect of EpiMethylTag  
11 method [21]. As with our approach they show that mATAC-seq detects methylation patterns that  
12 agree with both WGBS and Omni-ATAC (improved normal ATAC-seq [22]). By comparing  
13 parental and DNMT1 and DNMT3B double knockout HCT116 cells they identified ATAC peaks  
14 with increased accessibility that were bound by TFs only in the demethylated cells. However, they  
15 did not adapt their approach to analysis of methylated ChIP-seq peaks as we have done. Here  
16 we used M-ChIP to characterize the binding of both CTCF and KLF4 to motifs in the context of  
17 DNA methylation.

18 Methylation within CTCF motifs is known to be anticorrelated with CTCF binding [3]. Our analysis  
19 revealed that M-ATAC peaks containing a CTCF motif have an enriched CTCF intensity at CpGs  
20 with intermediate levels of methylation as opposed to low and high levels of methylation. In  
21 addition, CTCF M-ChIP revealed that methylation at CpG C2 is lower than at CpG at position  
22 C12, a finding that suggests methylation at C2 could have a stronger negative impact on CTCF  
23 binding than methylation at C12. Differences of this sort could not be detected by integrating  
24 CTCF ChIP-seq with WGBS (**Fig. 4b**).

1 We further demonstrate that M-ChIP could be used to characterize the profiles and methylation  
2 status of common WT and mutant KLF4 R462A binding sites. Thus, methylation levels do not  
3 explain the absence of Mutant KLF4 binding at these sites and it appears that the mutant does  
4 not bind the consensus motif so we cannot investigate the relationship between methylation in  
5 the KLF4 motif and binding of WT versus Mutant KLF4 (Fig. 4f-g). While the biological  
6 significance of such differences remains to be investigated, our data demonstrate that  
7 EpiMethylTag can be used to provide information about the methylation status of the binding sites  
8 for the WT and mutant proteins. This information could not be obtained by performing separate  
9 methylation and ChIP-seq experiments.

## 10 **Conclusion**

11 In sum, M-ATAC and CTCF M-ChIP reveal a complex interplay between accessible chromatin,  
12 DNA methylation and TF binding that could not be detected by WGBS. EpiMethylTag can be used  
13 to provide information about the DNA sequence and chromatin context of TF binding at  
14 methylated sites and its significance to gene regulation and biological processes. This technique  
15 can also be adapted for single cell analysis.

## 16 **Methods**

### 17 *Cell culture*

18 Mouse embryonic stem cells were provided by Matthias Stadtfeld. Briefly, KH2 embryonic stem  
19 cells (ESCs) [23] were cultured on irradiated feeder cells in KO-DMEM (Invitrogen) supplemented  
20 with L-glutamine, penicillin/streptomycin, nonessential amino acids,  $\beta$ -mercaptoethanol, 1,000  
21 U/mL LIF, and 15% FBS (ESC medium). To remove feeder cells from ESCs, cells were trypsin  
22 digested and pre-plated in ESC medium for 30 min. Supernatant containing ESCs was used for  
23 further experiments.

1 *KLF4 expression*

2 Mouse KLF4 has been cloned into pHAGE2-tetO-MCS-ires-tdTomato vector (obtained from  
3 Matthias Stadfeld's lab, [24]) for the production of lentiviruses, using the following primers:

4 Fwd: 5'– gcggccgcATGGCTGTCAGCGACGCTCT

5 Rev: 5'– ggatccTTAAAAGTGCCTCTTCATGTGTAAGG

6 KLF4 R462A mutation has been generated using the site-directed mutagenesis kit from Agilent  
7 #210518. HEK 293T cells were used for the production of lentiviruses; obtained from ATCC (cat.  
8 No. CRL 3216). Lentiviral infection of KLF4 knock-out mESC [20] was performed by spin-infection  
9 and the cells were transferred to feeders and expanded with puromycin. After selection, KLF4  
10 expression was induced with doxycycline (1ug/ml) for 2 days. Finally, the cells were pre-seeded  
11 (30 mins) to remove the feeders and the ES cells were processed as described in the "Cell culture"  
12 section. KLF4 protein expression has been checked by western blot using an antibody from  
13 Santa-Cruz (#sc-20691, now discontinued) and using H3 as a loading control (anti-H3, Abcam,  
14 ab1791).

15 *Assembly of the transposase*

16 Tn5 transposase was assembled with methylated adaptors as per the T-WGBS protocol[16]. Ten  
17 microliters of each adapter with incorporated methylated cytosines (Tn5mC-Apt1 and Tn5mC1.1-  
18 A1block; 100 µM each; **Table S1**) were added to 80 µl of water and annealed in a thermomixer  
19 with the following program: 95 °C for 3 min, 70 °C for 3 min, 45 cycles of 30 s with a ramp at –1  
20 °C per cycle to reach 26 °C. Fifty microliters of annealed adapters were incubated with 50 µl of  
21 hot glycerol and 10 µl of this mixture was incubated with 10 µl of Ez-Tn5 transposase (from the  
22 EZ-Tn5 insertion kit) at room temperature for 30 min to assemble the transposome.

1 *ATAC-seq and M-ATAC*

2 ATAC-seq and M-ATAC were performed with 50 thousand mESCs as per the original ATAC-seq  
3 protocol [13]. Cells were washed in cold PBS and resuspended in 50  $\mu$ l of cold lysis buffer (10  
4 mM Tris-HCl, pH 7.4, 10 mM NaCl, 3mM MgCl<sub>2</sub>, 0.1 % IGEPAL CA-630). The tagmentation  
5 reaction was performed in 25  $\mu$ l of TD buffer (Illumina Cat #FC-121-1030), 2.5  $\mu$ l Transposase  
6 (either the Nextera transposase (ATAC-seq) or the transposase containing the methylated  
7 adaptors (M-ATAC, see section “assembly of the transposase” for details), and 22.5  $\mu$ l of nuclease  
8 free H<sub>2</sub>O at 37°C for 30 min. Purified DNA (on column with the Qiagen Mini Elute kit) either bisulfite  
9 converted (M-ATAC, see section “Bisulfite conversion” for details) or directly amplified (ATAC-  
10 seq, see “Amplification of ATAC-seq and ChIP-seq libraries” for details).

11 *ChIPseq and M-ChIP*

12 ChIP-seq and M-ChIP were performed on mESC as per the original ChIPmentation protocol [14].  
13 Five microliters of CTCF antibody (Millipore 07-729) or 25  $\mu$ l of KLF4 antibody (R&D AF3158)  
14 were combined to protein A (for CTCF) or G (for KLF4) magnetic beads and added to sonicated  
15 chromatin (from 200 to 700bp, checked on agarose gel) from 10 million mESC, for 3 to 6 hours  
16 rotating in the cold room. Beads were washed as per the original ChIPmentation protocol [14]:  
17 twice with TF-WBI (20 mM Tris-HCl/pH 7.4, 150 mM NaCl, 0.1% SDS, 1% Triton X -100, 2 mM  
18 EDTA), twice with TF-WBIII (250 mM LiCl, 1% Triton X-100, 0.7% DOC, and 10mM Tris -HCl,  
19 1mM EDTA) and twice with cold Tris-Cl pH 8.0 to remove detergent, salts, and EDTA. During the  
20 second wash, the whole reaction was transferred to a new tube to decrease tagmentation of  
21 unspecific chromatin fragments sticking to the tube wall. Beads were resuspended in 25  $\mu$ l of the  
22 tagmentation reaction mix (10 mM Tris pH 8.0, 5 mM MgCl<sub>2</sub>, and 10% v/v dimethylformamide)  
23 and tagmentation was performed for 1 min at 37°C with either 1  $\mu$ l of the Nextera transposase  
24 (ChIP-seq) or the transposase containing the methylated adaptors (M-ChIP, see section

1 “assembly of the transposase” for details). Then, beads were washed twice with TF-WBI (20 mM  
2 Tris-HCl/pH 7.4, 150 mM NaCl, 0.1% SDS, 1% Triton X -100, and 2mM EDTA) and twice with  
3 TET (0.2% Tween -20, 10 mM Tris-HCl/pH 8.0, 1 mM EDTA). During the last wash, the whole  
4 reaction was transferred to a new tube to decrease carry-over of tagmented unspecific fragments  
5 stuck to the tube wall. Chromatin was eluted and decrosslinked by 70µl of elution buffer (0.5%  
6 SDS, 300 mM NaCl, 5 mM EDTA, 10 mM Tris HCl pH 8.0) containing 20µg of proteinase K for 2  
7 hours at 55 °C and overnight incubation at 65 °C. Eluted and purified DNA was either bisulfite  
8 converted (CTCF M-ChIP, see section “Bisulfite conversion” for details) or directly amplified  
9 (CTCF ChIP-seq, see “Amplification of ATAC-seq and ChIP-seq libraries” for details).

#### 10 *Bisulfite conversion*

11 Purified DNA was bisulfite converted following the T-WGBS protocol[16] with the EZ DNA  
12 methylation kit (Zymo). Oligonucleotide replacement was performed by incubating 9 µl of  
13 tagmented M-ATAC or M-ChIP purified DNA with 2 ng of phage lambda DNA as carrier, 2 µl of  
14 dNTP mix (2.5 mM each, 10 mM), 2 µl of 10× Ampligase buffer and 2 µl of replacement oligo  
15 (Tn5mC-RepIO1, 10 µM; Table S1) in a thermomixer with the following program: 50 °C for 1 min,  
16 45°C for 10 min, ramp at -0.1 °C per second to reach 37 °C. 1 µl of T4 DNA polymerase and 2.5  
17 µl of Ampligase were added and the gap repair reaction was performed at 37 °C for 30 min. DNA  
18 was purified using SPRI AMPure XP beads with a beads-to-sample ratio of 1.8:1 and eluted in 50  
19 µl of H<sub>2</sub>O. 5 µl were kept as an unconverted control sample, and 45 µl was bisulfite converted  
20 using the EZ DNA methylation kit (Zymo). Briefly, the gap repair reaction was performed by adding  
21 5 µl of M-dilution buffer and 15 min incubation at 37 °C, and bisulfite treatment was performed by  
22 adding 100 µl of liquid CT-conversion reagent in a thermomixer with the following program: 16  
23 cycles of 95 °C for 15 sec followed by 50 °C for 1 hour. Converted DNA was purified on a column  
24 and amplified (see section “Amplification of M-ATAC and M-ChIP libraries” for details).

1 *Amplification of ATAC-seq and ChIP-seq libraries*

2 Purified DNA (20 µl) was combined with 2.5 µl of each primer and 25 µl of NEB Next PCR master  
3 mix as per the original ATAC-seq protocol [13]. For ATAC-seq, DNA was amplified for 5 cycles  
4 and a monitored quantitative PCR was performed to determine the number of extra cycles needed  
5 not exceeding 12 cycles in total to limit the percentage of duplicated reads. DNA was purified on  
6 column with the Qiagen Mini Elute kit. For ChIP-seq, DNA was amplified as per the ChIPmentation  
7 protocol [14] in a thermomixer with the following program: 72 °C for 5 min; 98 °C for 30 s; 14  
8 cycles of 98 °C for 10 s, 63 °C for 30 s and 72 °C 30 s; and a final elongation at 72 °C for 1 min.  
9 DNA was purified using SPRI AMPure XP beads with a beads-to-sample ratio of 1:1 and eluted  
10 in 20 µl of H<sub>2</sub>O.

11 *Amplification of M-ATAC and M-ChIP libraries*

12 Purified converted DNA was amplified as per the original T-WGBS protocol [16]. Briefly, 10 µl of  
13 DNA was combined with 1.25 µl of each primer (25 µM each) and 12.5 µl of high-fidelity system  
14 KAPA HiFi uracil+ PCR master mix. DNA was amplified for 5 cycles and a monitored quantitative  
15 PCR was performed to determine the number of extra cycles needed, not exceeding 12 cycles in  
16 total to limit the percentage of duplicated reads.

17 *Sequencing of the libraries and data processing*

18 For ATAC-seq, ChIP-seq, M-ATAC and M-ChIP, libraries were quantified using Kapa qPCR kit  
19 and sequenced using the HiSeq 2500 for paired-end 50 bp reads). ChIP-seq for histone  
20 modifications in mESC were downloaded from GEO (H3K4me1: GSM1000121, H3K27ac:  
21 GSM1000126, H3K4me3: GSM1000124). Data processing was performed as per the pipeline  
22 available on Github (link: "<https://github.com/skoklab/EpiMethylTag>"). Briefly, reads were trimmed  
23 using trim-galore/0.4.4, and aligned to the mm10 assembly of mouse genome using bowtie2 [25]



1 for ChIP-seq and ATAC-seq, and using Bismark/0.18.1 (bowtie2) [26] for M-ChIP and M-ATAC to  
2 account for bisulfite conversion. Reads with quality < 30 and duplicates were removed using  
3 Samtools/1.3 [27]. Peaks were called using Macs/2.1.0 [28] with the following parameters: --  
4 qvalue 0.01 --nomodel --shift 0 -B --call-summits. Narrow peaks were considered for further  
5 analysis. Bigwigs were generated from bam files with RPKM normalization using Deeptools [29]  
6 for visualization on IGV.

### 7 *Bioinformatic analysis of data*

8 The distribution of fragment lengths was assessed with Deeptools/2.3.3 with option "--  
9 maxFragmentLength 1000", and Pearson correlations of reads counts with Deeptools/2.3.3 and  
10 default parameters. Heatmaps and average profiles were performed on merged bigwig files using  
11 Deeptools/2.3.3. Default parameters from Bismark/0.18.1 (Bowtie2) [26] were used to generate  
12 coverage files containing methylation information. Only cytosines in a CpG context were used for  
13 subsequent analysis. For **Fig. 3d** and **Figure S5b**, the plots were centered on CpGs in M-ATAC  
14 peaks from the different groups highlighted in **Fig. 3a**. For **Fig. 4a**, lists of CpGs were subsampled  
15 using BEDTools [30] to consider only the CpGs inside CTCF motifs, and the average plots were  
16 centered on those CpGs. Genomic annotations were performed using ChIPseeker [31]. CTCF  
17 motif locations in CTCF M-ChIP/ChIP and M-ATAC, and KLF4 motifs in M-ChIP peaks were  
18 determined using the FIMO tool from MEME [32], with the motif PWM from Jaspar database  
19 (MA0139.1 for CTCF and MA0039.1 and MA0039.2 for KLF4). PWM was manually modified to  
20 look at methylation frequency at different combinations of C2 and C12 dinucleotides of CTCF  
21 motif. Scripts are available on Github (link: "<https://github.com/skoklab/EpiMethylTag>") for the  
22 reviewers upon request and publicly upon acceptance. In order to account for possible lack of  
23 specificity of the anti-KLF4 antibody, we filtered out ChIP-seq peaks present in *Klf4*<sup>-/-</sup> cells. Peaks  
24 shared or specific to either WT or mutant KLF4 were identified using BEDTools [30]. **For the ChIP**

1 enrichment versus CpG methylation plots, we plotted the peak score versus the beta values of  
2 the CpG probes within the peaks, using peaks called via MACS2 for CTCF (**Figure S6b**) and via  
3 PeaKDEck for KLF4 (**Fig. 4c**).

4  
5 To quantify the probability of clustering CpG probes into low-, medium-, and highly methylated  
6 groups we assumed that beta values (ie the sampling mean) is normally distributed with mean  
7 the beta value ( $b$ ) and variance  $(b(1-b))/(n-1)$  where  $n$  is the total number of reads. This allows  
8 us to quantify the probability that each probe belongs to its designated cluster as  $P(b < C_h) -$   
9  $P(b < C_l)$  where  $C_h$  and  $C_l$  are the high and low thresholds of the cluster respectively. In the  
10 **Figure S6g**, the points and corresponding contours are colored based on their designated cluster.  
11 The x-axis is the beta value and the y-axis is the probability that beta lies within the cluster limits.  
12 For all clusters, more than half of the CpGs have a high probability of being in the assigned group  
13 (> 72%).

#### 14 **Figure legends**

15 **Fig. 1.** EpiMethylTag is a reproducible method to test whether DNAm can coexist with TF binding  
16 (CTCF) or chromatin accessibility. **a** Schematic overview of the EpiMethylTag method showing  
17 two possible outcomes. **b** Sequencing metrics indicating the total number of reads in million, the  
18 alignment and duplication percentages, the number of peaks and the fraction of reads in peaks  
19 (in percentage) for each sample as compared to public data (CTCF ChIP-BisSeq and WGBS).

20 **Fig. 2.** EpiMethylTag is a reproducible method for testing whether DNAm can coexist with TF  
21 binding (CTCF) or chromatin accessibility genome-wide. **a** Pearson correlation of read counts  
22 comparing M-ATAC with unconverted samples (NC) and regular ATAC-seq (top), and CTCF M-  
23 ChIP with unconverted samples, a sample from the Schubeler lab generated using ChIP-BisSeq

1 [1] (GSE39739) and regular CTCF ChIP-seq (bottom). **b** Representative IGV screenshots of  
2 EpiMethylTag, at the *Klf4* locus (left panel), the *Pisd-ps1* locus (middle panel), and the *Slc5a8*  
3 locus (right panel). ATAC and M-ATAC in green, CTCF in purple and DNA methylation from  
4 merged M-ATAC, merged CTCF M-ChIP and WGBS (methylation from 0% in blue to 100% in  
5 red). A zoom-in of methylation at the highlighted region is shown at the bottom of each example.  
6 The *Klf4* locus illustrates a region that has low methylation as detected by M-ATAC, CTCF M-  
7 ChIP and WGBS. The *Pisd-ps1* locus illustrates a region that has high methylation as detected  
8 by M-ATAC, CTCF M-ChIP and WGBS. The *Slc5a8* locus illustrates a region that has low  
9 methylation as detected by M-ATAC and high methylation as detected by WGBS. **c** Density plots  
10 of methylation from EpiMethyltag compared with WGBS. Only CpGs inside peaks and with at  
11 least 5 reads were considered. Top: average methylation of CpGs per M-ATAC peak in M-ATAC  
12 versus WGBS (Pearson Correlation = 0.69, p-value < 2.2e-16; bottom left corner: 27977 peaks,  
13 top left corner: 8408 peaks, top right corner: 1019 peaks, bottom right corner: 113 peaks). Bottom:  
14 average methylation per CTCF M-ChIP peak of CpGs in CTCF M-ChIP versus WGBS (Pearson  
15 Correlation = 0.74, p-value < 2.2e-16; bottom left corner: 6549 peaks, top left corner: 198 peaks,  
16 top right corner: 304 peaks, bottom right corner: 310 peaks).

17 **Fig. 3.** M-ATAC reveals a complex interplay between accessible chromatin and DNA methylation.  
18 **a** CpGs in M-ATAC peaks from merged replicates were divided into four groups according to  
19 methylation and coverage status: 1. Low Methylation (<20%) + High coverage (>50 reads) (22932  
20 CpGs). 2. Low Methylation + Low coverage (5 to 50 reads) (1348931 CpGs). 3. Intermediate  
21 methylation (20-80) + Low coverage (5 to 50 reads) (39321 CpGs). 4. High methylation (>80%) +  
22 Low coverage (5 to 50 reads) (1652 CpGs). \*\*\* P<1e-300 between groups #1 + 2 and group #3,  
23 \*\*\*P=3.25e-109 between groups #3 and 4 (Wilcoxon test). **b** Genomic annotations for M-ATAC  
24 peaks corresponding to the 4 groups from **Fig. 3a** as well as the full list of M-ATAC peaks.  
25 Promoter: TSS - 3kb and +3kb; intragenic: introns, exons, 5'UTR, 3'UTR and TTS, intergenic:

1 distal from promoter >1kb and non-coding RNAs. **c** Expression level of genes associated with the  
2 four groups of methylated CpGs from in **Fig. 3a**, for the CpGs at promoters. \*\*\*P=4.2e-33 between  
3 groups #1 and 2, \*\*\*P=2.8e-75 between groups #2 and 3, \*P=0.034 between groups #3 and 4  
4 (Wilcoxon test). **d** Average profile of M-ATAC, H3K4me1, H3K4me3 and H3K27ac signal  
5 associated with the four groups of methylated CpGs from **Fig. 3a** at promoters versus non-  
6 promoters. Of note, the small number of promoters in group 4 gives an unsmooth pattern for  
7 marks such as H3K4me1 and H3K27ac.

8 **Fig. 4.** M-ChIP enables analysis of DNA methylation binding by CTCF and KLF4. **a** Top:  
9 Schematic illustration representing an ATAC-seq peak with a CTCF motif and CTCF occupancy  
10 dependent on C2 and C12 methylation. Bottom: average profiles of M-ATAC (left) and CTCF M-  
11 ChIP (right) intensity at CpGs in a CTCF motif within M-ATAC peaks for the four groups of CpGs  
12 (group #1: 288 CpGs, group #2: 17133 CpGs, group #3 CpGs: 758, group #4: 25 CpGs). **b** top:  
13 CTCF motif from JASPAR database (MA0139.1). The 2 key CpG positions (C2 and C12) are  
14 indicated and bottom: violin plots of methylation percentage from CTCF M-ChIP and WGBS, at  
15 C2 and C12 positions into CTCF motif (MA0139.1). \*\*\*P=1.02e-12 for C2 CTCF M-ChIP versus  
16 C12 CTCF M-ChIP (Wilcoxon test), \*\*P=0.008 for C2 WGBS versus C12 WGBS (Wilcoxon test),  
17 \*\*\*P=9e-12 for C2 CTCF M-ChIP versus C2 WGBS (Wilcoxon test, paired), \*\*\*P=0.00075 for C12  
18 CTCF M-ChIP versus C12 WGBS (Wilcoxon test, paired), \*P=0.023 for CTCF M-ChIP versus  
19 WGBS (logistic regression model). **c** Scatter plot showing the relationship between binding  
20 strength and CpG methylation within the KLF4 M-ChIP peaks (Pearson Correlation = 0.25; bottom  
21 left corner: 5138 CpGs, top left corner: 578 CpGs, top right corner: 104 CpGs, bottom right corner:  
22 60 CpGs). **d** Venn diagram showing the overlap between WT and mutant KLF4 M-ChIP peaks. **e**  
23 Top: Illustration of KLF4 motifs from the Jaspas database (MA0039.1 and MA0039.2). The black  
24 bar represents the potential CpGs present in the MA0039.2 motif. Bottom: histogram showing the  
25 relative distribution of KLF4 motifs in WT, mutant and common KLF4 M-ChIP peaks using FIMO

1 from the MEME suite. Absolute numbers of each motif are indicated. **f Heatmap showing M-ATAC**  
2 **signal intensity at KLF4 M-ChIP peaks that are specific to WT (1836 peaks), mutant (267 peaks)**  
3 **or common between both conditions (303 peaks).** **g Average cytosine methylation from M-ATAC**  
4 **in WT versus mutant KLF4 expressing cells in WT specific KLF4 M-ChIP peaks (Pearson**  
5 **Correlation = 0.78, p-value < 2.2e-16).**

6 **Figure S1.** Peak calling in EpiMethylTag, ATAC-seq and CTCF ChIP-seq. **a** Table showing  
7 number of peaks called for each sample, using MACS2. **b** Jaccard indexes of peak intersections  
8 between ATAC, M-ATAC, M-ATAC-NC samples (left panel) and CTCF ChIP-seq, CTCF M-ChIP  
9 and CTCF M-ChIP-NC samples (right panel). Jaccard Index = (Intersection / (sample 1 + sample  
10 2 – Intersection)). **c** Scatter plots showing correlation of signal within peaks (union of any peak  
11 found in either condition). PCC = Pearson Correlation Curve. The x and y axes represent the  
12 log2fold of read counts.

13 **Figure S2.** Read lengths for all ATAC, M-ATAC, M-ATAC unconverted (M-ATAC-NC), CTCF  
14 ChIP-seq, CTCF M-ChIP and CTCF M-ChIP unconverted (CTCF M-ChIP-NC) samples.

15 **Figure S3.** Average methylation in M-ATAC peaks for CpGs with coverage of at least 5 reads,  
16 relative to the position of the CpGs in the peak.

17 **Figure S4.** Density plots of average methylation correlations for cytosines with coverage of at  
18 least 5 reads. **a** Average cytosine methylation from a M-ATAC replicate 1 versus replicate 2 in M-  
19 ATAC peaks (Pearson Correlation = 0.76, p-value < 2.2e-16). **b** CTCF M-ChIP replicate 1 versus  
20 replicate 2 in CTCF M-ChIP peaks (Pearson Correlation = 0.84, p-value < 2.2e-16). **c** CTCF ChIP-  
21 BisSeq (GSE39739) from Dirk Schubeler lab versus WGBS in CTCF ChIP-BisSeq peaks  
22 (Pearson Correlation = 0.83, p-value < 2.2e-16). **d Average methylation of CpGs per M-ATAC**  
23 **peak in M-ATAC versus WGBS, only for M-ATAC peaks that overlap between both replicates**

1 (Pearson Correlation = 0.67, p-value < 2.2e-16). **e** Average methylation per CTCF M-ChIP peak  
2 of CpGs in CTCF M-ChIP versus WGBS only for M-ChIP peaks that overlap between both  
3 replicates (Pearson Correlation = 0.80, p-value < 2.2e-16). **f** Genomic annotations of peaks  
4 grouped according to their average methylation from WGBS and M-ATAC (relative to **Fig. 3c**, top  
5 panel). Promoter: TSS - 3kb to +3kb; intragenic: introns, exons, 5'UTR, 3'UTR and TTS,  
6 intergenic: distal from promoter >3kb. **g** Transcriptional output for the 4 groups of M-ATAC peaks  
7 according to their average methylation from WGBS and M-ATAC from **Figure S4d**, for the  
8 cytosines at promoters (left panel, see **Figure S4d**). \*\*\*P=1.25e-28 between groups #1 and 2,  
9 <sup>NS</sup>P=0.19 between groups #2 and 3, <sup>NS</sup>P=0.58 between groups #3 and 4 (Wilcoxon test), and for  
10 the cytosines at intragenic regions (right panel, introns, exons, 5'UTR, 3'UTR, see **Figure S4d**).  
11 \*\*\*P= 0.0001 between groups #1 and 2, \*P= 0.02 between groups #2 and 3, <sup>NS</sup>P= 0.1 between  
12 groups #3 and 4 (Wilcoxon test).

13 **Figure S5. a** CpGs in M-ATAC peaks that overlap between both replicates were divided into three  
14 groups according to methylation status from M-ATAC: 1/ Low Methylation (<20%, 423379 CpGs),  
15 2/ Intermediate methylation (20-80, 7390 CpGs), 3/ High methylation (>80%, 162 CpGs). **b** CpGs  
16 in M-ATAC peaks were divided into three groups according to methylation status from WGBS: 1/  
17 Low Methylation (<20%, 351561 CpGs), 2/ Intermediate methylation (20-80, 58655 CpGs), 3/  
18 High methylation (>80%, 17385 CpGs). Of note, a cutoff of 5 reads coverage were applied, and  
19 as opposed to **Fig. 3a**, no additional division was made based on coverage. \*\*\*P <0.001  
20 (Wilcoxon text). **c** Transcriptional output for the 4 groups from **Fig. 3a**, for the CpGs in M-ATAC  
21 peaks at intragenic regions (introns, exons, 5'UTR, 3'UTR, see **Fig. 3b**). \*P= 0.028 between  
22 groups #1 and 2, \*\*\*P= 1.38e-38 between groups #2 and 3, <sup>NS</sup>P= 0.88 between groups #3 and 4  
23 (Wilcoxon test). **d** Heatmaps of M-ATAC from individual replicates compared to merged replicates  
24 for the 4 groups of CpGs in M-ATAC peaks from **Fig. 3a**. **e** Heatmaps of M-ATAC, H3K4me1,  
25 H3K4me3 and H3K27ac signal corresponding to the average profiles shown in **Fig. 3d** for the 4

1 groups of CpGs in M-ATAC peaks from **Fig. 3a** at promoters (left panel) versus non-promoters  
2 (right panel). **f** Table showing the number of CpGs, M-ATAC and CTCF M-ChIP peaks, CTCF  
3 motifs and CpGs within CTCF motifs for the 4 groups of CpGs in M-ATAC peaks from **Fig. 3a**.

4 **Figure S6.** CTCF M-ChIP. **a** Comparison of CTCF motifs found using CTCF ChIP-seq and CTCF  
5 M-ChIP. **b** Scatter plot showing the relationship between CTCF enrichment and CpG methylation  
6 within the CTCF motifs in CTCF M-ChIP peaks. **c** CpGs within CTCF motifs in M-ChIP peaks that  
7 overlap between both replicates were divided into three groups according to methylation status  
8 from M-ChIP: 1/ Low Methylation (<20%, 20644 CpGs), 2/ Intermediate methylation (20-80, 3809  
9 CpGs), 3/ High methylation (>80%, 328 CpGs). **d** Heatmaps of CTCF M-ChIP signal from  
10 individual replicates compared to merged replicates for the 3 groups of CpGs in M-ChIP peaks  
11 from **Figure S6c** and average profile for merged replicates. **e** Representative IGV screenshots of  
12 the 3 groups of CpGs in a CTCF motif within a CTCF peak shown in **Figure S6c** based on  
13 methylation levels from CTCF M-ChIP. **f** Table showing the number of CpGs and CTCF M-ChIP  
14 peaks depending on methylation levels of either all CpGs in CTCF peaks or only CpGs within a  
15 CTCF motif. **g** Scatter plot showing probability of the CpGs in a CTCF motif for **Figure S3c** being  
16 in their assigned group.

17 **Figure S7.** Methylation at C2 and C12 CpGs within CTCF motif. **a** Tables and histogram  
18 representing the number of cytosines at position C2 and C12 in the CTCF motif MA0139.1 in  
19 CTCF M-ChIP peaks as well as the frequency of the observed versus expected co-occurrence of  
20 methylation at C2 and C12 ( $\chi^2 = 1531$ , p-value < 0.001), and the number of CTCF motifs for  
21 each C2/C12 methylation combination. **b** Heatmap and average profile of CTCF M-ChIP signal  
22 at CTCF motifs with C2/C12 methylation combinations. **c** Frequency of methylation in the CTCF  
23 motif from CTCF M-ChIP, for the 7 possible combinations of base variations associated with C at  
24 positions 2 (1st couple of nucleotides) and 12 (2d couple of nucleotides).

1 **Figure S8.** KLF4 mutation. **a** Sequencing from the IRES reverse primer of WT versus Mutant  
2 Klf4. The reverse complement of the sequence highlights the wild type (Arginine, R) and mutant  
3 (Alanine, A) Klf4. **b** Western blot showing the levels of KLF4 protein and H3 bulk histone in WT  
4 mESC, *Klf4*<sup>-/-</sup> mESC and *Klf4*<sup>-/-</sup> mESC that expressed either a WT or a mutant version of KLF4. **c**  
5 Heatmap showing the binding profile of WT and mutant KLF4 R462A duplicates at WT specific  
6 (1836), mutant specific (267) and common (303) KLF4 M-ChIP peaks defined in **Fig. 4d**. **d**  
7 Average cytosine methylation from M-ATAC versus KLF4 M-ChIP in WT KLF4 expressing cells  
8 (top panel, Pearson Correlation = 0.78, p-value < 2.2e-16) and from KLF4 M-ChIP versus WGBS  
9 (bottom panel, Pearson Correlation = 0.84, p-value < 2.2e-16) for CpGs within WT specific KLF4  
10 M-ChIP peaks.

11

## 12 **Funding**

13 This work was supported by 1R35GM122515 (J.S), AACR Takeda Multiple Myeloma fellowship  
14 (P.L), and National Cancer Center (P.L).

15

## 16 **Availability of data and materials**

17 All raw and processed sequencing data generated in this study have been submitted to the NCBI  
18 Gene Expression Omnibus (GEO; <http://www.ncbi.nlm.nih.gov/geo/>) under accession number  
19 GSE129673. The following secure token has been created to allow review of record GSE129673  
20 while it remains in private status: Shkzikwortmhhal.

21



1 **Author contributions**

2 P.L and F.I designed the EpiMethylTag experiments. S.V, V.S and D.C.D.G designed and  
3 performed the experiments involving KLF4. P.L performed the CHIP/M-ChIP/ATAC/M-ATAC  
4 experiments. G.S, M.C and K-T.K developed the analytical pipeline. PL, G.S, F.I, T.S, S.B, M.C  
5 and K-T.K analyzed the data. J.S, E.A, M.S and J.S supervised the study. P.L and J.S wrote the  
6 paper.

7

8 **Ethics approval and consent to participate**

9 Not applicable

10

11 **Competing interests**

12 The authors declare they have no competing interests

13

14 **Acknowledgements**

15 The authors thank the New York University School of Medicine High Performance Computing  
16 (HPC) for computing technical support, and Adriana Heguy and the Genome Technology Center  
17 (GTC) core for sequencing efforts.

18

19 **References**

- 1 1. Dor Y, Cedar H: **Principles of DNA methylation and their implications for biology and**  
2 **medicine.** *Lancet* 2018, **392**:777-786.
- 3 2. Hu S, Wan J, Su Y, Song Q, Zeng Y, Nguyen HN, Shin J, Cox E, Rho HS, Woodard C, et  
4 al: **DNA methylation presents distinct binding sites for human transcription factors.**  
5 *Elife* 2013, **2**:e00726.
- 6 3. Maurano MT, Wang H, John S, Shafer A, Canfield T, Lee K, Stamatoyannopoulos JA:  
7 **Role of DNA Methylation in Modulating Transcription Factor Occupancy.** *Cell Rep*  
8 2015, **12**:1184-1195.
- 9 4. Zhu H, Wang G, Qian J: **Transcription factors as readers and effectors of DNA**  
10 **methylation.** *Nat Rev Genet* 2016, **17**:551-565.
- 11 5. Fouse SD, Shen Y, Pellegrini M, Cole S, Meissner A, Van Neste L, Jaenisch R, Fan G:  
12 **Promoter CpG methylation contributes to ES cell gene regulation in parallel with**  
13 **Oct4/Nanog, PcG complex, and histone H3 K4/K27 trimethylation.** *Cell Stem Cell*  
14 2008, **2**:160-169.
- 15 6. Natarajan A, Yardimci GG, Sheffield NC, Crawford GE, Ohler U: **Predicting cell-type-**  
16 **specific gene expression from regions of open chromatin.** *Genome Res* 2012,  
17 **22**:1711-1722.
- 18 7. Meissner A, Gnirke A, Bell GW, Ramsahoye B, Lander ES, Jaenisch R: **Reduced**  
19 **representation bisulfite sequencing for comparative high-resolution DNA**  
20 **methylation analysis.** *Nucleic Acids Res* 2005, **33**:5868-5877.
- 21 8. Kelly TK, Liu Y, Lay FD, Liang G, Berman BP, Jones PA: **Genome-wide mapping of**  
22 **nucleosome positioning and DNA methylation within individual DNA molecules.**  
23 *Genome Res* 2012, **22**:2497-2506.

- 1 9. Yin Y, Morgunova E, Jolma A, Kaasinen E, Sahu B, Khund-Sayeed S, Das PK, Kivioja T,  
2 Dave K, Zhong F, et al: **Impact of cytosine methylation on DNA binding specificities**  
3 **of human transcription factors.** *Science* 2017, **356**.
- 4 10. Brinkman AB, Gu H, Bartels SJ, Zhang Y, Matarese F, Simmer F, Marks H, Bock C, Gnirke  
5 A, Meissner A, Stunnenberg HG: **Sequential ChIP-bisulfite sequencing enables direct**  
6 **genome-scale investigation of chromatin and DNA methylation cross-talk.** *Genome*  
7 *Res* 2012, **22**:1128-1138.
- 8 11. Statham AL, Robinson MD, Song JZ, Coolen MW, Stirzaker C, Clark SJ: **Bisulfite**  
9 **sequencing of chromatin immunoprecipitated DNA (BisChIP-seq) directly informs**  
10 **methylation status of histone-modified DNA.** *Genome Res* 2012, **22**:1120-1127.
- 11 12. Feldmann A, Ivanek R, Murr R, Gaidatzis D, Burger L, Schubeler D: **Transcription factor**  
12 **occupancy can mediate active turnover of DNA methylation at regulatory regions.**  
13 *PLoS Genet* 2013, **9**:e1003994.
- 14 13. Buenrostro JD, Giresi PG, Zaba LC, Chang HY, Greenleaf WJ: **Transposition of native**  
15 **chromatin for fast and sensitive epigenomic profiling of open chromatin, DNA-**  
16 **binding proteins and nucleosome position.** *Nat Methods* 2013, **10**:1213-1218.
- 17 14. Schmidl C, Rendeiro AF, Sheffield NC, Bock C: **ChIPmentation: fast, robust, low-input**  
18 **ChIP-seq for histones and transcription factors.** *Nat Methods* 2015, **12**:963-965.
- 19 15. Adey A, Shendure J: **Ultra-low-input, tagmentation-based whole-genome bisulfite**  
20 **sequencing.** *Genome Res* 2012, **22**:1139-1143.
- 21 16. Wang Q, Gu L, Adey A, Radlwimmer B, Wang W, Hovestadt V, Bahr M, Wolf S, Shendure  
22 J, Eils R, et al: **Tagmentation-based whole-genome bisulfite sequencing.** *Nat Protoc*  
23 2013, **8**:2022-2032.

- 1 17. Stadler MB, Murr R, Burger L, Ivanek R, Lienert F, Scholer A, van Nimwegen E,  
2 Wirbelauer C, Oakeley EJ, Gaidatzis D, et al: **DNA-binding factors shape the mouse**  
3 **methylome at distal regulatory regions.** *Nature* 2011, **480**:490-495.
- 4 18. Wang H, Maurano MT, Qu H, Varley KE, Gertz J, Pauli F, Lee K, Canfield T, Weaver M,  
5 Sandstrom R, et al: **Widespread plasticity in CTCF occupancy linked to DNA**  
6 **methylation.** *Genome Res* 2012, **22**:1680-1688.
- 7 19. Hashimoto H, Wang D, Horton JR, Zhang X, Corces VG, Cheng X: **Structural Basis for**  
8 **the Versatile and Methylation-Dependent Binding of CTCF to DNA.** *Mol Cell* 2017,  
9 **66**:711-720 e713.
- 10 20. Di Giammartino DC, Kloetgen A, Polyzos A, Liu Y, Kim D, Murphy D, Abuhashem A,  
11 Cavaliere P, Aronson B, Shah V, et al: **KLF4 binding is involved in the organization**  
12 **and regulation of 3D enhancer networks during acquisition and maintenance of**  
13 **pluripotency.** *bioRxiv* 2019:382473.
- 14 21. Spektor R, Tippens ND, Mimoso CA, Soloway PD: **methyl-ATAC-seq measures DNA**  
15 **methylation at accessible chromatin.** *Genome Res* 2019.
- 16 22. Corces MR, Trevino AE, Hamilton EG, Greenside PG, Sinnott-Armstrong NA, Vesuna S,  
17 Satpathy AT, Rubin AJ, Montine KS, Wu B, et al: **An improved ATAC-seq protocol**  
18 **reduces background and enables interrogation of frozen tissues.** *Nat Methods* 2017,  
19 **14**:959-962.
- 20 23. Beard C, Hochedlinger K, Plath K, Wutz A, Jaenisch R: **Efficient method to generate**  
21 **single-copy transgenic mice by site-specific integration in embryonic stem cells.**  
22 *Genesis* 2006, **44**:23-28.
- 23 24. Vidal SE, Amlani B, Chen T, Tsirigos A, Stadtfeld M: **Combinatorial modulation of**  
24 **signaling pathways reveals cell-type-specific requirements for highly efficient and**  
25 **synchronous iPSC reprogramming.** *Stem Cell Reports* 2014, **3**:574-584.

- 1 25. Langmead B, Salzberg SL: **Fast gapped-read alignment with Bowtie 2**. *Nat Methods*  
2 2012, **9**:357-359.
- 3 26. Krueger F, Andrews SR: **Bismark: a flexible aligner and methylation caller for**  
4 **Bisulfite-Seq applications**. *Bioinformatics* 2011, **27**:1571-1572.
- 5 27. Li H, Handsaker B, Wysoker A, Fennell T, Ruan J, Homer N, Marth G, Abecasis G, Durbin  
6 R, Genome Project Data Processing S: **The Sequence Alignment/Map format and**  
7 **SAMtools**. *Bioinformatics* 2009, **25**:2078-2079.
- 8 28. Zhang Y, Liu T, Meyer CA, Eeckhoute J, Johnson DS, Bernstein BE, Nusbaum C, Myers  
9 RM, Brown M, Li W, Liu XS: **Model-based analysis of ChIP-Seq (MACS)**. *Genome Biol*  
10 2008, **9**:R137.
- 11 29. Ramirez F, Ryan DP, Gruning B, Bhardwaj V, Kilpert F, Richter AS, Heyne S, Dunder F,  
12 Manke T: **deepTools2: a next generation web server for deep-sequencing data**  
13 **analysis**. *Nucleic Acids Res* 2016, **44**:W160-165.
- 14 30. Quinlan AR, Hall IM: **BEDTools: a flexible suite of utilities for comparing genomic**  
15 **features**. *Bioinformatics* 2010, **26**:841-842.
- 16 31. Yu G, Wang LG, He QY: **ChIPseeker: an R/Bioconductor package for ChIP peak**  
17 **annotation, comparison and visualization**. *Bioinformatics* 2015, **31**:2382-2383.
- 18 32. Bailey TL, Boden M, Buske FA, Frith M, Grant CE, Clementi L, Ren J, Li WW, Noble WS:  
19 **MEME SUITE: tools for motif discovery and searching**. *Nucleic Acids Res* 2009,  
20 **37**:W202-208.

21

**a** Schematics of the EpiMethylTag method

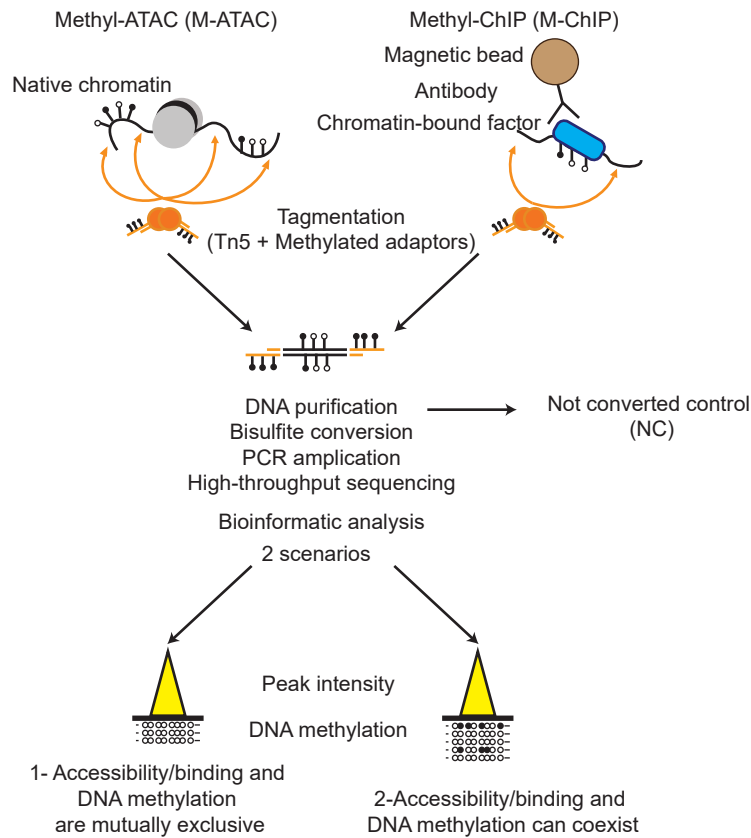

**b** Sequencing metrics

|                             | raw reads counts (million) | Alignment % | duplication % | peaks # | Fraction of reads in peaks (%) |
|-----------------------------|----------------------------|-------------|---------------|---------|--------------------------------|
| Methyl-ATAC-rep3            | 25.70                      | 62.61       | 54.30         | 31907   | 6.25                           |
| Methyl-ATAC-rep4            | 19.66                      | 63.52       | 46.94         | 30413   | 6.26                           |
| ATAC_mESC-1                 | 42.70                      | 63.55       | 47.81         | 28717   | 4.22                           |
| ATAC_mESC-2                 | 43.67                      | 64.65       | 43.60         | 37537   | 5.25                           |
| ATAC_Tn5me-NC-1             | 32.35                      | 67.00       | 64.70         | 31806   | 8.03                           |
| ATAC_Tn5me-NC-2             | 35.73                      | 67.85       | 61.53         | 36710   | 9.09                           |
| CTCF Methyl-ChIP-rep1       | 25.91                      | 66.72       | 71.74         | 33898   | 9.70                           |
| CTCF Methyl-ChIP-rep2       | 22.54                      | 69.48       | 85.01         | 32195   | 11.91                          |
| CTCF ChIP-BisSeq (GSE39739) | 264.78                     | 32.80       | 58.36         | 64460   | 10.49                          |
| CTCF ChIP-rep1              | 29.56                      | 81.79       | 34.77         | 41731   | 8.18                           |
| CTCF ChIP-rep2              | 32.38                      | 82.98       | 39.73         | 52327   | 14.19                          |
| CTCF Methyl-ChIP-NC-rep1    | 30.95                      | 63.11       | 85.11         | 22576   | 7.85                           |
| CTCF Methyl-ChIP-NC-rep2    | 29.56                      | 75.68       | 85.17         | 31409   | 12.81                          |
| WGBS                        | 257.12                     | 74.98       | 8.27          | NA      | NA                             |

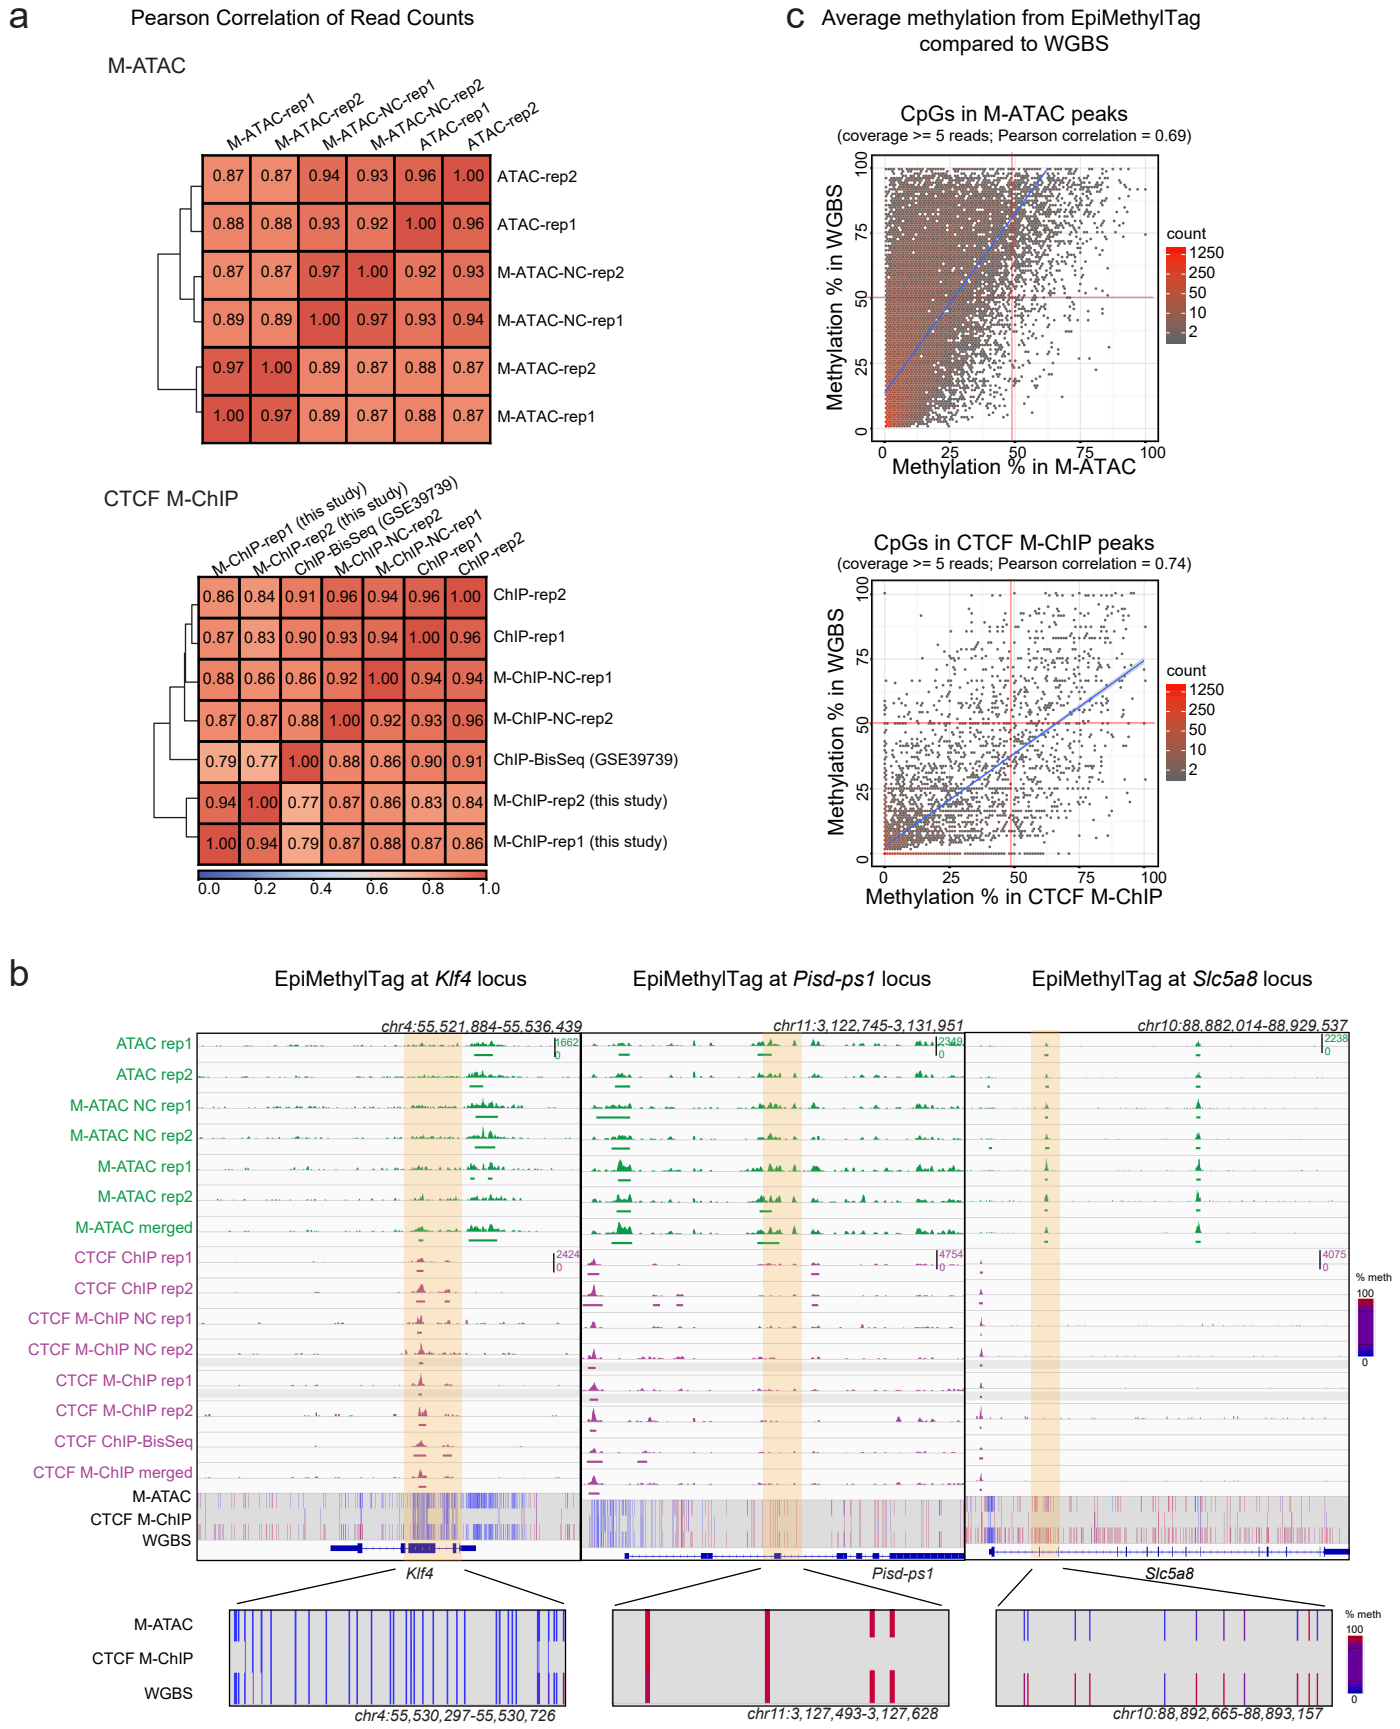

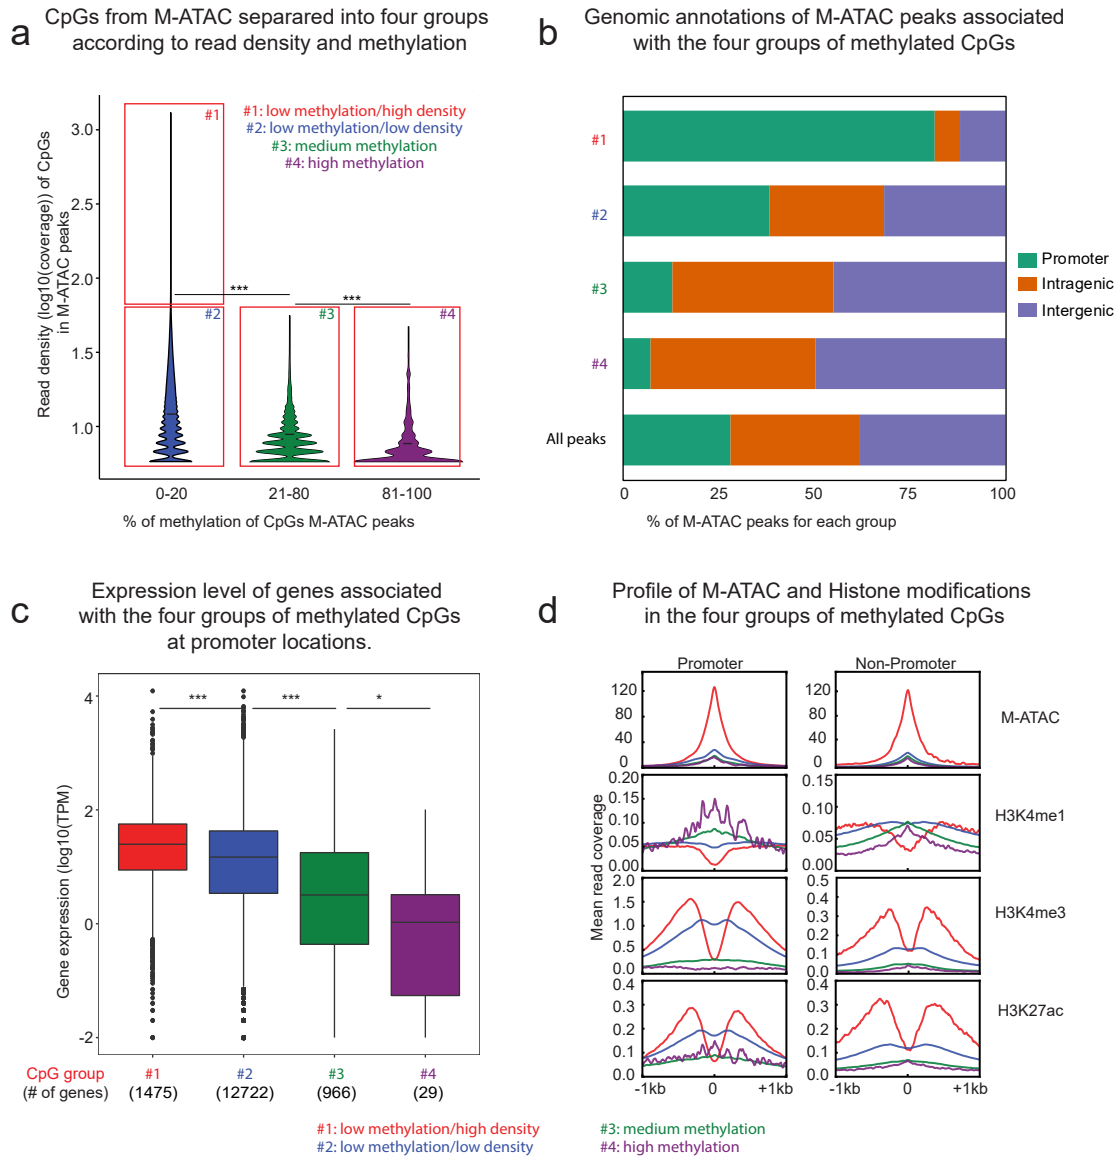



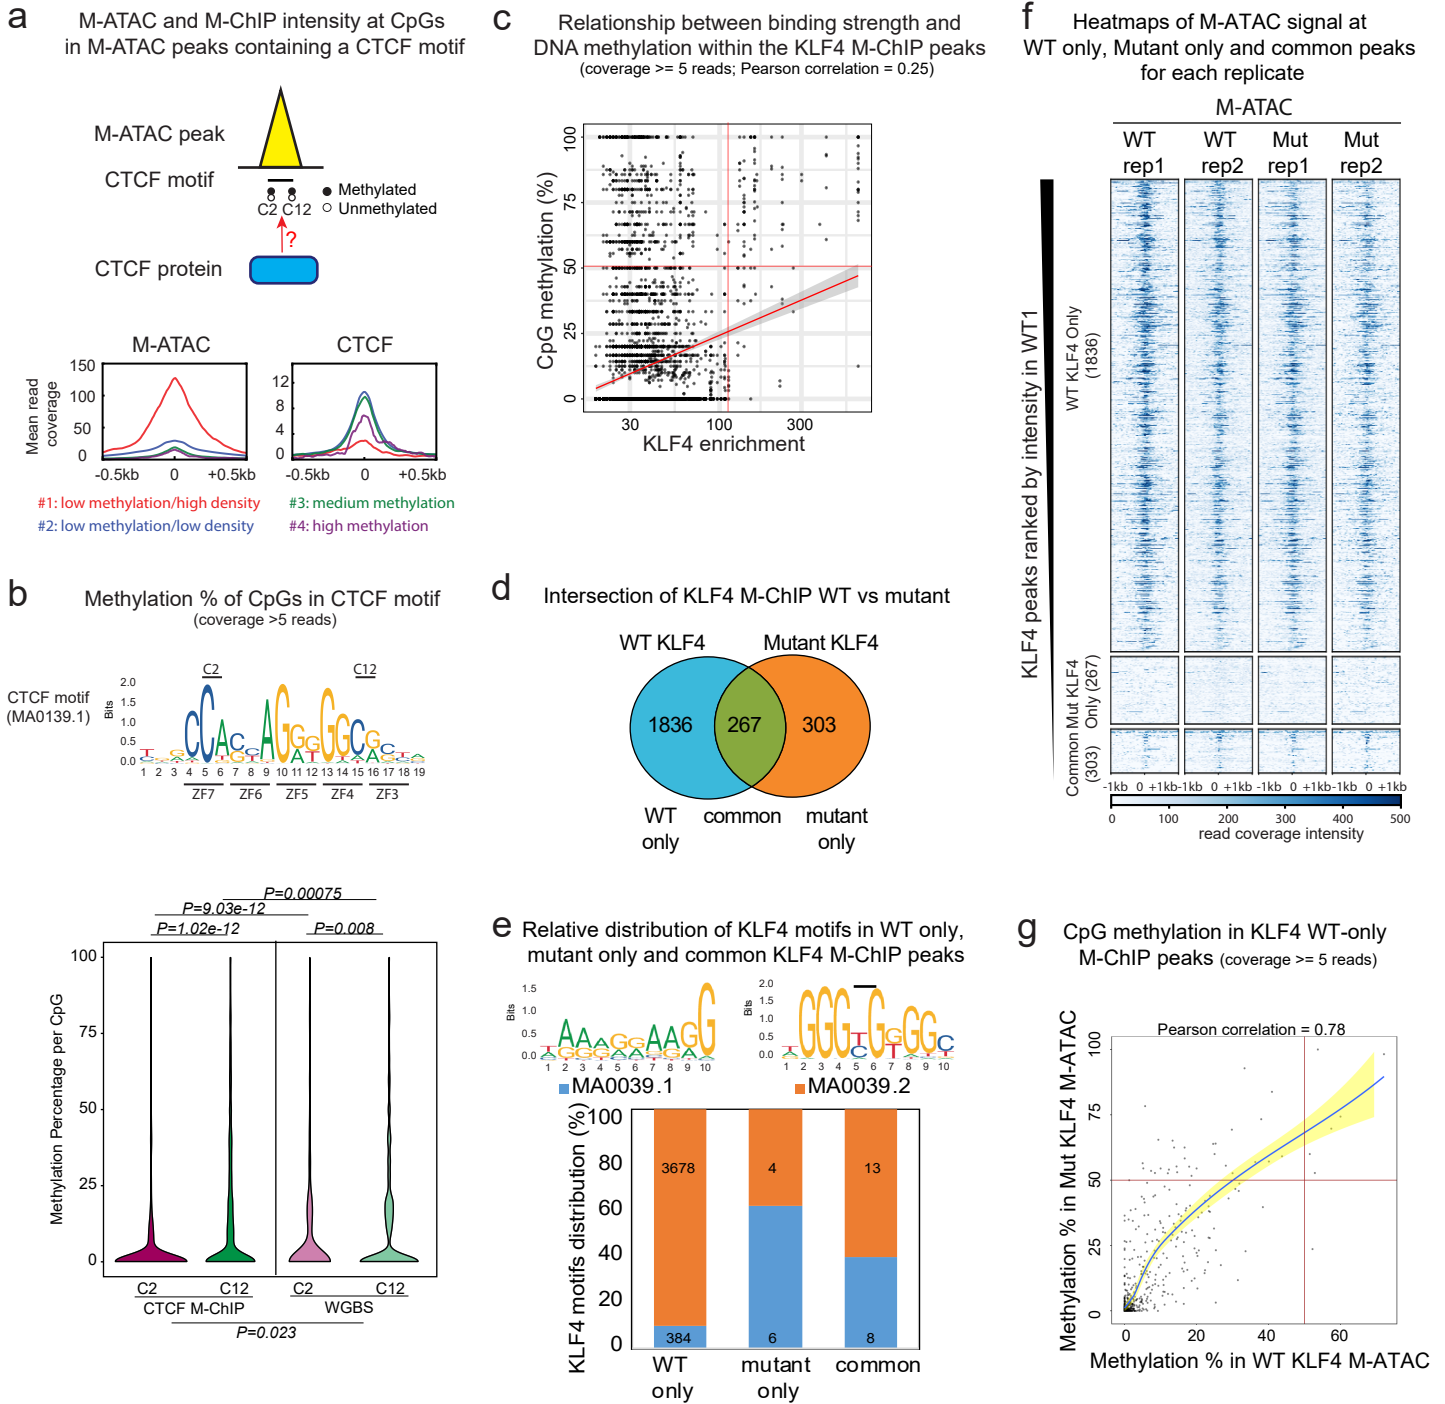

Source: https://www.biorxiv.org/content/biorxiv/early/2019/09/13/549550.full.pdf
